# Supplementary material for: Genotyping by Sequencing of Cultivated Lentil (Lens culinaris Medik.) Highlights Population Structure in the Mediterranean Gene Pool Associated With Geographic Patterns and Phenotypic Variables
Source: Front Genet. 2019 Sep 18;10:872. doi: 10.3389/fgene.2019.00872 (PMC6759463; doi:10.3389/fgene.2019.00872)
Supplement: Supplementary file 10 [file Table_1.xlsx]

## Sheet: Foglio1
Supplementary Table S1. List of accessions genotyped in this study. For each accession, information on the identification code provided by the IBBR-CNR gene bank (http://ibbr.cnr.it/mgd/), the country of origin and, when available, the site of acquisition, is provided.
Internal code	Accession number (IBBR)	Origin	Latitude	Longitude	Altitude (m)
MG226	116051	Albania	40.310001	19.490000	350
MG227	116052	Albania	40.310001	19.490000	300
MG228	116054	Albania	40.270000	20.000000	500
MG43	106365	Algeria	27.500000	0.250000	315
MG45	106398	Algeria	27.500000	0.250000	315
MG46	106399	Algeria	35.14	0.400000	860
MG47	106400	Algeria	35.139999	0.400000	860
MG48	106401	Algeria	35.139999	0.400000	860
MG49	106402	Algeria	35.139999	0.400000	860
MG51	106404	Algeria	35.139999	0.400000	860
MG52	106405	Algeria	35.139999	0.400000	860
MG53	106407	Algeria	34.480000	0.090000	1131
MG73	106786	Algeria	34.480000	0.090000	1131
MG74	106787	Algeria	23.8333	5.350000	910
MG76	106793	Algeria	23.9167	6.16667	1380
MG77	106796	Algeria	23.500000	6.08333	1760
MG78	106797	Algeria	23.500000	6.08333	1760
MG79	106798	Algeria	25.5667	6.083333	1760
MG81	106800	Algeria	23.500000	6.083333	1760
MG82	106802	Algeria	23.916668	6.16667	1380
MG139	107516	Algeria	24.4833	9.58333	980
MG141	107530	Algeria	24.4833	9.58333	980
MG142	107533	Algeria	24.4833	9.58333	980
MG144	107539	Algeria	26.45	8.500000	550
MG145	107546	Algeria	24.8333	8.400000	1100
MG188	112364	Cyprus	n.a.	n.a.	n.a.
MG190	112366	Cyprus	n.a.	n.a.	n.a.
MG192	112371	Cyprus	n.a.	n.a.	n.a.
MG193	112372	Cyprus	n.a.	n.a.	n.a.
MG194	112373	Cyprus	n.a.	n.a.	n.a.
MG196	112375	Cyprus	n.a.	n.a.	n.a.
MG197	112376	Cyprus	n.a.	n.a.	n.a.
MG198	112377	Cyprus	n.a.	n.a.	n.a.
MG199	112378	Cyprus	n.a.	n.a.	n.a.
MG201	112380	Cyprus	n.a.	n.a.	n.a.
MG203	112382	Cyprus	n.a.	n.a.	n.a.
MG157	110828	Egypt	26.200001	32.650002	0
MG158	110829	Egypt	26.066668	32.816666	0
MG159	110830	Egypt	25.983334	32.833332	0
MG160	110831	Egypt	26.883333	32.716667	0
MG161	110832	Egypt	26.3333	31.866667	0
MG162	110833	Egypt	26.366667	31.666668	0
MG163	110834	Egypt	24.950001	32.866669	0
MG164	110835	Egypt	24.966667	32.883331	0
MG165	110836	Egypt	25.916668	32.799999	0
MG5	103447	Ethiopia	9.080000	38.150002	2630
MG6	103466	Ethiopia	9.560000	38.500000	0
MG7	103472	Ethiopia	9.560000	38.500000	0
MG8	103473	Ethiopia	9.560000	38.480000	0
MG9	103494	Ethiopia	14.210000	39.200001	2910
MG10	103504	Ethiopia	10.130000	38.700001	0
MG11	103572	Ethiopia	8.450000	37.299999	2000
MG12	103581	Ethiopia	8.500000	38.470001	1940
MG13	103587	Ethiopia	8.380000	38.470001	1930
MG14	103593	Ethiopia	8.510000	38.310001	1950
MG15	103610	Ethiopia	6.250000	39.000000	1210
MG16	103614	Ethiopia	6.250000	37.450001	2810
MG20	106299	Ethiopia	n.a.	n.a.	n.a.
MG21	106300	Ethiopia	n.a.	n.a.	n.a.
MG25	106304	Ethiopia	n.a.	n.a.	n.a.
MG26	106305	Ethiopia	n.a.	n.a.	n.a.
MG27	106306	Ethiopia	n.a.	n.a.	n.a.
MG29	106308	Ethiopia	n.a.	n.a.	n.a.
MG30	106309	Ethiopia	n.a.	n.a.	n.a.
MG31	106310	Ethiopia	n.a.	n.a.	n.a.
MG33	106312	Ethiopia	n.a.	n.a.	n.a.
MG35	106314	Ethiopia	n.a.	n.a.	n.a.
MG36	106315	Ethiopia	n.a.	n.a.	n.a.
MG37	106316	Ethiopia	n.a.	n.a.	n.a.
MG39	106318	Ethiopia	n.a.	n.a.	n.a.
MG41	106320	Ethiopia	n.a.	n.a.	n.a.
MG146	107657	former USSR	n.a.	n.a.	n.a.
MG83	106803	Greece	n.a.	n.a.	n.a.
MG84	106818	Greece	n.a.	n.a.	n.a.
MG85	106847	Greece	n.a.	n.a.	n.a.
MG88	106974	Greece	39.8833	20.516666	510
MG89	106977	Greece	39.8833	20.516666	510
MG90	106986	Greece	39.900002	20.559999	622
MG91	106987	Greece	39.380001	20.500000	550
MG92	106992	Greece	39.466667	20.740000	836
MG93	107001	Greece	39.480000	20.389999	514
MG94	107017	Greece	39.520000	20.660000	428
MG96	107029	Greece	n.a.	n.a.	n.a.
MG18	106286	Iran	n.a.	n.a.	n.a.
MG19	106287	Iran	n.a.	n.a.	n.a.
MG207	112578	Iran	n.a.	n.a.	n.a.
MG208	112579	Iran	n.a.	n.a.	n.a.
MG209	112580	Iran	n.a.	n.a.	n.a.
MG211	112582	Iran	n.a.	n.a.	n.a.
MG212	112583	Iran	n.a.	n.a.	n.a.
MG213	112584	Iran	n.a.	n.a.	n.a.
MG215	112586	Iran	n.a.	n.a.	n.a.
MG216	112587	Iran	n.a.	n.a.	n.a.
MG1	103215	Italy	40.500000	16.100000	862
MG2	103240	Italy	40.500000	16.100000	862
MG3	103253	Italy	41.400002	15.300000	245
MG4	103281	Italy	41.01	15.040000	500
MG17	103653	Italy	n.a.	n.a.	n.a.
MG55	106665	Italy	n.a.	n.a.	n.a.
MG87	106899	Italy	n.a.	n.a.	n.a.
MG153	110288	Italy	40.666668	16.600000	450
MG154	110290	Italy	40.750000	17.400000	350
MG155	110438	Italy	41.683334	16.016666	300
MG168	110918	Italy	n.a.	n.a.	n.a.
MG169	111106	Italy	40.783333	15.433333	1000
MG170	111849	Italy	40.500000	15.916667	550
MG171	111854	Italy	40.4	16.166668	800
MG172	111863	Italy	40.316666	15.916667	600
MG187	112253	Italy	37.9	15.016667	700
MG218	113061	Italy	37.433334	13.750000	500
MG219	113062	Italy	37.6	13.766667	640
MG220	115108	Italy	41.816666	14.300000	960
MG221	115109	Italy	41.849998	14.116667	1300
MG223	115495	Italy	40.500000	17.583332	130
MG224	115654	Italy	43.716667	13.100000	140
MG232	n.a.	Italy	n.a.	n.a.	n.a.
MG238	n.a.	Italy	n.a.	n.a.	n.a.
MG239	n.a.	Italy	n.a.	n.a.	n.a.
MG240	n.a.	Italy	n.a.	n.a.	n.a.
MG247	n.a.	Italy	n.a.	n.a.	n.a.
MG248	n.a.	Italy	n.a.	n.a.	n.a.
MG249	n.a.	Italy	n.a.	n.a.	n.a.
MG250	n.a.	Italy	n.a.	n.a.	n.a.
MG251	n.a.	Italy	n.a.	n.a.	n.a.
MG252	n.a.	Italy	n.a.	n.a.	n.a.
MG253	n.a.	Italy	n.a.	n.a.	n.a.
MG254	n.a.	Italy	n.a.	n.a.	n.a.
MG255	n.a.	Italy	n.a.	n.a.	n.a.
MG175	111909	Libya	31.916668	12.083333	500
MG176	111910	Libya	26.55	13.200000	400
MG178	112113	Morocco	32.000000	-8.91667	180
MG179	112114	Morocco	32.000000	-8.91667	180
MG181	112116	Morocco	20.3833	-9.48333	100
MG182	112117	Morocco	31.0167	-7.91667	900
MG183	112118	Morocco	20.3833	-9.48333	100
MG184	112120	Morocco	31.750000	-6.650000	990
MG185	112163	Morocco	n.a.	n.a.	n.a.
MG186	112164	Morocco	n.a.	n.a.	n.a.
MG229	n.a.	n.a (Eston)	n.a.	n.a.	n.a.
MG235	n.a.	n.a (Laird)	n.a.	n.a.	n.a.
MG241	n.a.	n.a (Laird)	n.a.	n.a.	n.a.
MG242	n.a.	n.a (Laird)	n.a.	n.a.	n.a.
MG243	n.a.	n.a (Laird)	n.a.	n.a.	n.a.
MG147	109605	Nepal	n.a.	n.a.	n.a.
MG105	107387	Pakistan	n.a.	n.a.	n.a.
MG106	107388	Pakistan	n.a.	n.a.	n.a.
MG107	107389	Pakistan	n.a.	n.a.	n.a.
MG109	107391	Pakistan	n.a.	n.a.	n.a.
MG110	107392	Pakistan	n.a.	n.a.	n.a.
MG111	107393	Pakistan	n.a.	n.a.	n.a.
MG112	107394	Pakistan	n.a.	n.a.	n.a.
MG114	107396	Pakistan	n.a.	n.a.	n.a.
MG115	107397	Pakistan	n.a.	n.a.	n.a.
MG116	107398	Pakistan	n.a.	n.a.	n.a.
MG118	107400	Pakistan	n.a.	n.a.	n.a.
MG119	107401	Pakistan	n.a.	n.a.	n.a.
MG120	107402	Pakistan	n.a.	n.a.	n.a.
MG122	107404	Pakistan	n.a.	n.a.	n.a.
MG124	107406	Pakistan	n.a.	n.a.	n.a.
MG127	107409	Pakistan	n.a.	n.a.	n.a.
MG128	107410	Pakistan	n.a.	n.a.	n.a.
MG129	107411	Pakistan	n.a.	n.a.	n.a.
MG130	107414	Pakistan	n.a.	n.a.	n.a.
MG131	107415	Pakistan	n.a.	n.a.	n.a.
MG134	107418	Pakistan	n.a.	n.a.	n.a.
MG135	107420	Pakistan	n.a.	n.a.	n.a.
MG136	107421	Pakistan	n.a.	n.a.	n.a.
MG137	107422	Pakistan	n.a.	n.a.	n.a.
MG100	107188	Spain	39.4833	-1.88333	610
MG101	107189	Spain	39.500000	-1.66667	610
MG149	109690	Spain	n.a.	n.a.	n.a.
MG151	109692	Spain	n.a.	n.a.	n.a.
MG173	111875	Sweden	n.a.	n.a.	n.a.
MG56	106673	Tunisia	n.a.	n.a.	n.a.
MG57	106679	Tunisia	n.a.	n.a.	n.a.
MG59	106689	Tunisia	n.a.	n.a.	n.a.
MG60	106692	Tunisia	n.a.	n.a.	n.a.
MG61	106699	Tunisia	n.a.	n.a.	n.a.
MG63	106729	Tunisia	34.6333	9.250000	860
MG64	106737	Tunisia	33.85	9.816667	250
MG65	106743	Tunisia	33.8667	10.100000	20
MG66	106746	Tunisia	33.5167	9.966667	474
MG67	106748	Tunisia	33.4833	10.350000	90
MG68	106751	Tunisia	33.4833	10.833333	40
MG69	106754	Tunisia	33.533333	10.966667	90
MG70	106756	Tunisia	33.7833	10.966667	15
MG71	106763	Tunisia	35.116669	10.683333	50
MG72	106766	Tunisia	35.0833	11.000000	20
