# Supplementary material for: Genotyping by Sequencing of Cultivated Lentil (Lens culinaris Medik.) Highlights Population Structure in the Mediterranean Gene Pool Associated With Geographic Patterns and Phenotypic Variables
Source: Front Genet. 2019 Sep 18;10:872. doi: 10.3389/fgene.2019.00872 (PMC6759463; doi:10.3389/fgene.2019.00872)
Supplement: Supplementary file 13 [file Table_4.xlsx]

## Sheet: Foglio1
Supplementary Table S4. Mean, range, standard deviation (SD) and heritability (h2B) of flowering time, plant height, height of first flowering node and morphometric seed traits (area, perimeter and diameter) assessed in non-redundant accessions genotyped in this study.
Trait	Mean	Range	SD	h2B
Flowering time (days from sowing)	140	130-159	7	0.77
Plant height (cm)	37	20-62	7	0.51
Height of first flowering node (cm)	16	8-29	4	0.33
Area (mm2)	17.71	8.50-35.10	6.64	0.97
Perimeter (mm)	15.79	5.50-22.90	3.1	0.93
Diameter (mm)	4.62	3.20-6.60	0.86	0.97
